# Supplementary material for: Polysiloxane-Based Polyurethanes with High Strength and Recyclability
Source: MDPI journal article supplement (doi:10.3390/ijms232012613), 2022-10-20
Supplement: s1 [file s1]

Supporting Information

## **Polysiloxane-Based Polyurethanes with High-Strength and Recyclability**

*Wencai Wang<sup>1,2,3</sup>, Xueyang Bai<sup>1</sup>, Siao Sun<sup>1</sup>, Yangyang Gao<sup>1,2,3</sup>, Fanzhu Li<sup>1,2,3\*</sup>, Shikai Hu<sup>1,2,3\*</sup>*

<sup>1</sup> State Key Laboratory of Organic-Inorganic Composites, Beijing University of Chemical Technology, Beijing 100029, China

<sup>2</sup> Key Laboratory of Carbon Fiber and Functional Polymers, Ministry of Education, Beijing University of Chemical Technology, Beijing 10029, China

<sup>3</sup> Beijing Engineering Research Center of Advanced Elastomers, Beijing University of Chemical Technology, Beijing 100029, China.

\* Corresponding author:

lifz@mail.buct.edu.cn (Fanzhu Li);

skhu@mail.buct.edu.cn (Shikai Hu)

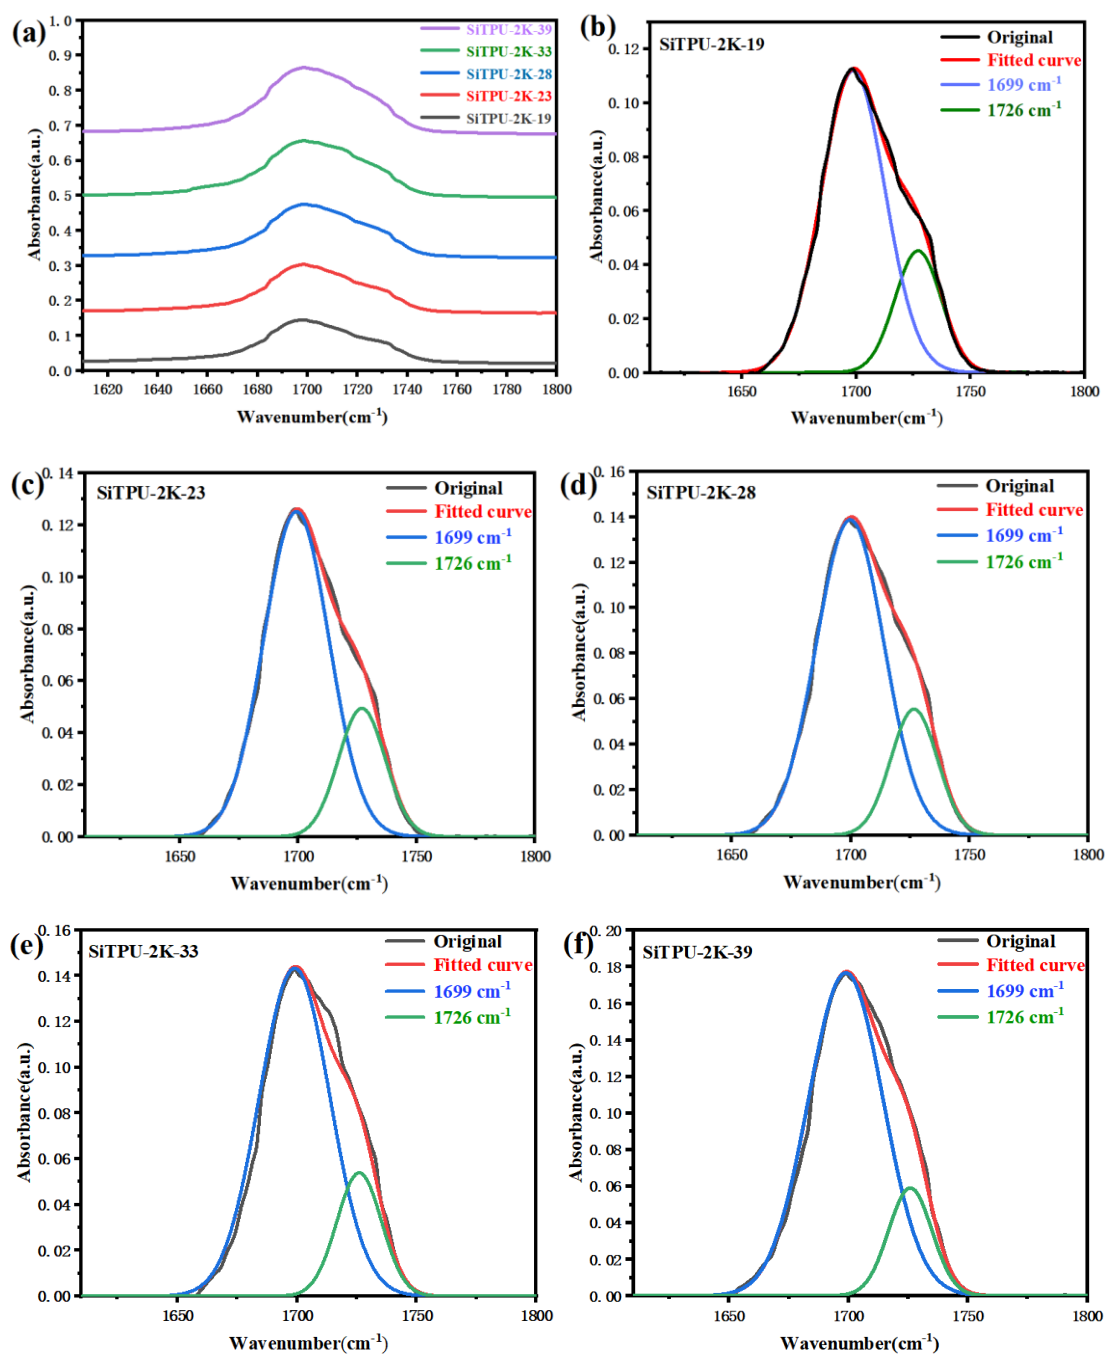

**Fig S1.** (a) FTIR spectra of Si-TPUs in the carbonyl regions from 1610 to 1800  $\text{cm}^{-1}$ . Fitted Curve of the carbonyl groups of SiTPU-2K-19 (b), SiTPU-2K-23 (c), SiTPU-2K-28 (d), SiTPU-2K-33 (e) and SiTPU-2K-39 (f).

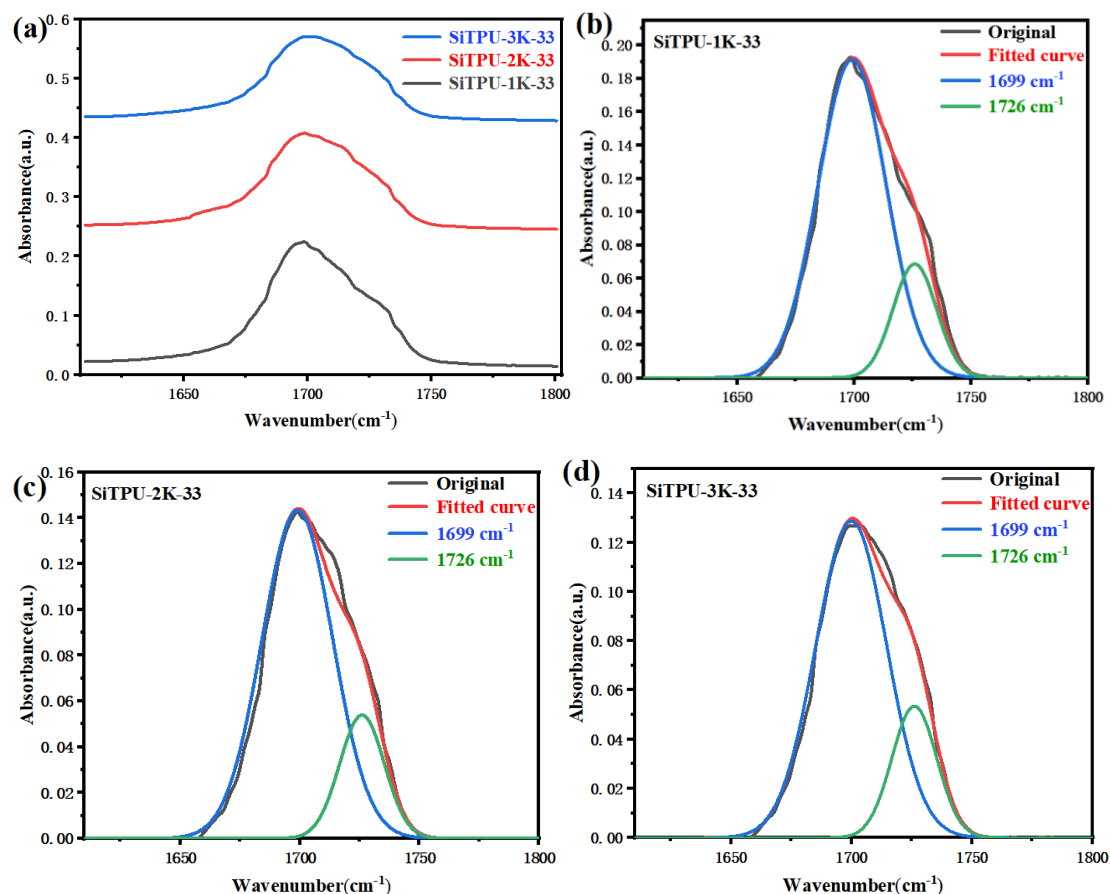

**Fig S2.** (a) FTIR spectra of Si-TPUs in the carbonyl regions from 1610 to 1800  $\text{cm}^{-1}$ . Fitted Curve of the carbonyl groups of SiTPU-1K-33(b), SiTPU-2K-33 (c), SiTPU-3K-33 (d).

**Table S1.** Molecular weights and molecular weight distribution indices of Si-TPUs.

| Sample      | $M_n$ ( $10^4$ ) | $M_w$ ( $10^4$ ) | $\bar{D}$ |
|-------------|------------------|------------------|-----------|
| SiTPU-1K-33 | 5.1              | 11.5             | 2.2       |
| SiTPU-2K-19 | 2.6              | 4.6              | 1.7       |
| SiTPU-2K-23 | 2.6              | 5.0              | 1.9       |
| SiTPU-2K-28 | 2.6              | 5.1              | 1.9       |
| SiTPU-2K-33 | 2.8              | 5.4              | 1.9       |
| SiTPU-2K-39 | 2.5              | 4.8              | 1.9       |
| SiTPU-3K-33 | 3.6              | 7.8              | 2.1       |

**Table S2.** Periodic size (D) of the Si-TPUs.

| Sample      | $Q$ (nm <sup>-1</sup> ) | D (nm) |
|-------------|-------------------------|--------|
| SiTPU-1K-33 | 0.1169                  | 53.7   |
| SiTPU-2K-19 | 0.1058                  | 59.4   |
| SiTPU-2K-23 | 0.0925                  | 67.9   |
| SiTPU-2K-28 | 0.0813                  | 77.3   |
| SiTPU-2K-33 | 0.0751                  | 83.7   |
| SiTPU-2K-39 | 0.0647                  | 97.1   |
| SiTPU-3K-33 | 0.0527                  | 119.2  |

**Table S3.** Summary of the mechanical performance values of Si-TPUs.

| Sample      | Tensile stress (MPa) | Elongation at break (%) | Stress at 100% elongation (MPa) | Stress at 300% elongation (MPa) | Hardness (Shore A) | Toughness (MJ M <sup>-3</sup> ) |
|-------------|----------------------|-------------------------|---------------------------------|---------------------------------|--------------------|---------------------------------|
| SiTPU-1K-33 | 17.0±0.3             | 776±17                  | 3.6                             | 6.7                             | 74                 | 65.4                            |
| SiTPU-2K-19 | 0.1±0.1              | 724±24                  | 0.1                             | 0.1                             | 28                 | 0.9                             |
| SiTPU-2K-23 | 1.7±0.3              | 510±17                  | 1.3                             | 1.7                             | 51                 | 7.9                             |
| SiTPU-2K-28 | 6.0±0.2              | 431±19                  | 4.2                             | 5.3                             | 71                 | 20.5                            |
| SiTPU-2K-33 | 11.8±0.4             | 425±16                  | 6.8                             | 9.6                             | 78                 | 35.8                            |
| SiTPU-2K-39 | 21.5±0.5             | 388±13                  | 10.8                            | 18.5                            | 85                 | 55.6                            |
| SiTPU-3K-33 | 11.8±0.4             | 210±15                  | 9.5                             | -                               | 81                 | 19.1                            |

**Table S4.** The mechanical performance values of Si-TPUs after multiple recycles.

| Sample      | Tensile stress (MPa) | Elongation at break (%) | Stress at 100% elongation (MPa) | Stress at 300% elongation (MPa) | Hardness (Shore A) | Toughness (MJ M <sup>-3</sup> ) |
|-------------|----------------------|-------------------------|---------------------------------|---------------------------------|--------------------|---------------------------------|
| SiTPU-2K-39 | 21.5 ± 0.5           | 388 ± 13                | 10.8                            | 18.5                            | 85                 | 55.6                            |
| 1st         | 19.3 ± 0.3           | 386 ± 14                | 9.7                             | 16.6                            | 85                 | 49.8                            |
| 2nd         | 18.5 ± 0.2           | 380 ± 12                | 9.4                             | 16.1                            | 85                 | 46.9                            |
| 3rd         | 17.4 ± 0.5           | 367 ± 13                | 8.9                             | 15.3                            | 85                 | 42.6                            |

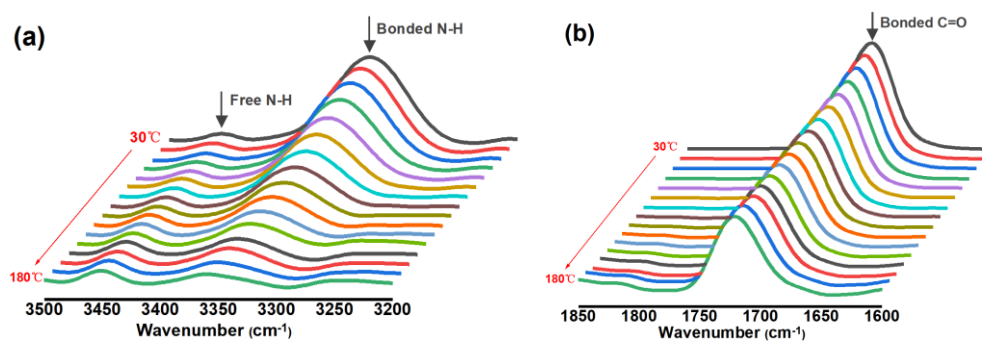

**Fig S3.** FTIR spectra of (a)N–H and (b)C=O from SiTPU-2K-39.
